# Supplementary material
Source: publisher figshare collection journal article supplement (https://acs.figshare.com/ndownloader/files/4023544)
Supplement: Supplementary file 1 [file 4023544]

## Chemo- and regioselective catalytic reduction of *N*-heterocycles by silane

*Sun-Hwa Lee, Dmitry V. Gutsulyak, Georgii I. Nikonov*

Chemistry Department, Brock University, 500 Glenridge Ave., St. Catharines, ON, L2S 3A1 Canada. Email: gnikonov@brocku.ca

**Experimental details.** All manipulations were carried out using conventional high-vacuum or nitrogen-line Schlenk techniques. NMR spectra were recorded on a Bruker DPX-300 ( $^1\text{H}$ , 300 MHz;  $^{13}\text{C}$ , 75.4 MHz) and/or Bruker DPX-600 ( $^1\text{H}$ , 600 MHz;  $^{13}\text{C}$ , 150.8 MHz) spectrometers at 298 K. All chemicals were purchased from Sigma-Aldrich and Alfa Aesar apart from  $\text{HSiMe}_2\text{Ph}$  which was purchased from Gelest. These reagents were used without further purification. Acetone- $\text{d}_6$  and  $\text{CD}_2\text{Cl}_2$  were purchased from Cambridge Isotope Laboratories.  $\text{CD}_2\text{Cl}_2$  was dried over  $\text{CaH}_2$  and acetone- $\text{d}_6$  was dried over molecular sieves (3Å). Other solvents were dried by distillation from appropriate drying agents or using Grubbs-type solvent purification system. Complex  $[\text{Cp}(\text{iPr}_3\text{P})\text{Ru}(\text{CH}_3\text{CN})_2]\text{An}$  (**1**) ( $\text{An} = \text{PF}_6^-$  or  $\text{B}(\text{C}_6\text{F}_5)_4^-$ ) was prepared according to literature procedures.<sup>1</sup>

### Catalytic hydrosilylation

**3-Chloropyridine.** The reaction was performed in  $\text{CH}_2\text{Cl}_2$  (0.6 mL) with 3-chloropyridine (12.4  $\mu\text{L}$ , 0.13 mmol),  $\text{HSiMe}_2\text{Ph}$  (30  $\mu\text{L}$ , 0.19 mmol) and **1-BAF** (0.006 g, 5% mol). Full conversion of the starting chloropyridine was observed after 15 min at ambient temperature to give *N*-silylated 1,4-dihydro-3-chloropyridine.

$^1\text{H}$  NMR ( $\text{CH}_2\text{Cl}_2$ ,  $\text{D}_2\text{O}$  insert):  $\delta$  7.50-7.45 (m, 2, Ph), 7.37-7.28 (m, 3, Ph), 6.05 (s, 1, N-CH), 5.83 (d,  $J(\text{H-H}) = 7.9$  Hz, 1, N-CH), 4.47 (m, 1, NCH=CH), 3.12 (s, 2,  $\text{CH}_2$ ), 0.40 (s, 6,

*SiMe*).  $^1\text{H}$ - $^{13}\text{C}$  HSQC ( $\text{CH}_2\text{Cl}_2$ ,  $\text{D}_2\text{O}$  insert, selected data):  $\delta$  127.4 (NCH=CH), 125.7 (NCH=CCl), 99.1 (NCH=CH), 30.2 ( $\text{CH}_2$ ), -3.3 (*SiMe*).  $^1\text{H}$ - $^{29}\text{Si}$  HSQC ( $\text{CH}_2\text{Cl}_2$ ,  $\text{D}_2\text{O}$  insert):  $\delta$  3.5

**3,5-Lutidine.** The reaction was performed in  $\text{CH}_2\text{Cl}_2$  (0.6 mL) with 3,5-lutidine (15.0  $\mu\text{L}$ , 0.13 mmol),  $\text{HSiMe}_2\text{Ph}$  (30  $\mu\text{L}$ , 0.19 mmol) and **1-BAF** (0.006 g, 5% mol). There was 82% conversion of the starting pyridine after 3 h at ambient temperature.

*N*-(*SiMe*<sub>2</sub>Ph)-1,4-dihydro-3,5-lutidine:  $^1\text{H}$  NMR ( $\text{CH}_2\text{Cl}_2$ ,  $\text{D}_2\text{O}$  insert):  $\delta$  7.50-7.45 (m, 2, Ph), 7.37-7.28 (m, 3, Ph), 5.72 (s, 2, NCH=C( $\text{CH}_3$ )), 2.65 (s, 2,  $\text{CH}_2$ ), 1.46 (s, 6, NCH=C( $\text{CH}_3$ )), 0.38 (s, 6, *SiMe*).  $^1\text{H}$ - $^{13}\text{C}$  HSQC ( $\text{CH}_2\text{Cl}_2$ ,  $\text{D}_2\text{O}$  insert, selected data):  $\delta$  122.7 (NCH=C( $\text{CH}_3$ )), 33.7 ( $\text{CH}_2$ ), 19.9 (NCH=C( $\text{CH}_3$ )), -3.3 (*SiMe*).  $^1\text{H}$ - $^{29}\text{Si}$  HSQC ( $\text{CH}_2\text{Cl}_2$ ,  $\text{D}_2\text{O}$  insert):  $\delta$  2.5.

**2,6-Lutidine.** To a solution of  $\text{HSiMe}_2\text{Ph}$  (7.7  $\mu\text{L}$ , 0.05 mmol) and 2,6-lutidine (5.4  $\mu\text{L}$ , 0.05 mmol) in  $\text{CD}_2\text{Cl}_2$  was added  $[\text{Cp}^*(\text{phen})\text{Ru}(\text{CH}_3\text{CN})]\text{PF}_6$  (1.5 mg, 0.0025 mmol). The reaction was periodically monitored by NMR spectroscopy. No reaction was observed at 70°C.

**2,4-Lutidine.** To a solution of  $\text{HSiMe}_2\text{Ph}$  (7.7  $\mu\text{L}$ , 0.05 mmol) and 2,4-lutidine (5.4  $\mu\text{L}$ , 0.05 mmol) in  $\text{CD}_2\text{Cl}_2$  was added  $[\text{Cp}^*(\text{phen})\text{Ru}(\text{CH}_3\text{CN})]\text{PF}_6$  (1.5 mg, 0.0025 mmol). The reaction was periodically monitored by NMR spectroscopy. No reaction was observed at 70°C.

**2-Bromopyridine.** To a solution of 2-bromopyridine (12.4  $\mu\text{L}$ , 0.13 mmol) and  $\text{HSiMe}_2\text{Ph}$  (30  $\mu\text{L}$ , 0.19 mmol) in  $\text{CH}_2\text{Cl}_2$  (0.6 mL) was added **1-BAF** (0.006 g, 5% mol). After 3 h at ambient temperature there was 47% conversion of 2-bromopyridine into a mixture of pyridine and *N*-silyl 1,4-dihydropyridine (1:4).

**2-Ethylpyridine.** To a solution of 2-ethylpyridine (15  $\mu\text{L}$ , 0.13 mmol) and  $\text{HSiMe}_2\text{Ph}$  (30  $\mu\text{L}$ , 0.19 mmol) in  $\text{CH}_2\text{Cl}_2$  (0.6 mL) was added **1-BAF** (0.006 g, 5% mol). There was no

hydrosilylation of 2-ethylpyridine after 3 h at ambient temperature, only the hydrosilylation of the acetonitrile ligands and slow chlorination of silane by CH<sub>2</sub>Cl<sub>2</sub> was observed.

### ***Quinoline.***

*Method 1.* To a mixture of HSiMe<sub>2</sub>Ph (338.8.0 μL, 2.20 mmol) and quinoline (260.0 μL, 2.00 mmol) was added [Cp<sup>\*</sup>Ru(Phen)(CH<sub>3</sub>CN)]PF<sub>6</sub> (8.4 mg, 0.014 mmol). The reaction was periodically monitored by NMR spectroscopy. 80% conversion was achieved after 5 h at 70°C. A mixture of *N*-(SiMe<sub>2</sub>Ph)-1,2-dihydroquinoline (3%) and *N*-(SiMe<sub>2</sub>Ph)-1,4-dihydroquinoline (97%) was obtained. Full conversion was achieved overnight. Isolated yield 0.52 g (98 %).

*Method 2 (reaction without solvent).* To a mixture of quinoline (0.20 mL, 1.7 mmol) and HSiMe<sub>2</sub>Ph (0.26 mL, 1.7 mmol) was added **1-BAF** (0.009 g, 0.5% mol). There was 70% conversion of quinoline after 2 h at ambient temperature with formation of a mixture of *N*-(SiMe<sub>2</sub>Ph)-1,2-dihydroquinoline (19%) and *N*-(SiMe<sub>2</sub>Ph)-1,4-dihydroquinoline (81%). The products decomposed slowly (>20 h) with the formation of a complex mixture.

*Method 3.* Complex [Cp(*i*Pr<sub>3</sub>P)Ru(CH<sub>3</sub>CN)<sub>2</sub>]BAF (0.007 g, 5% mol) was added to a solution of quinoline (15.4 μL, 0.13 mmol) and HSiMe<sub>2</sub>Ph (30 μL, 0.19 mmol) in CH<sub>2</sub>Cl<sub>2</sub> (0.6 mL). After 30 min at ambient temperature 50 % of the quinoline was converted into a mixture of *N*-(SiMe<sub>2</sub>Ph)-1,2-dihydroquinoline (22%) and *N*-(SiMe<sub>2</sub>Ph)-1,4-dihydroquinoline (78%). The mixture of hydrosilylated quinolines slowly decomposed (after 24 h) with the formation of a complex mixture of products.

*Method 4 (reaction with DSiMe<sub>2</sub>Ph).* To a mixture of DSiMe<sub>2</sub>Ph (174.3 μL, 1.27 mmol) and quinoline (150.0 μL, 1.27 mmol) was added [Cp<sup>\*</sup>(phen)Ru(CH<sub>3</sub>CN)]PF<sub>6</sub> (5.5 mg, 0.0089 mmol). The reaction was periodically monitored by NMR spectroscopy. After 5 h at 70°C, 75% of quinoline was converted into *N*-(SiMe<sub>2</sub>Ph)-1,4-dihydroquinoline. The identity of the product was confirmed by <sup>2</sup>H and <sup>1</sup>H-<sup>13</sup>C HSQC NMR.

*N*-(*SiMe<sub>2</sub>Ph*)-1,4-dihydroquinoline: <sup>1</sup>H NMR (CDCl<sub>3</sub>, selected data): δ 6.29 (d, *J*(H-H) = 7.8 Hz, 1, NCHCHCH<sub>2</sub>), 4.77 (dt, *J*(H-H) = 7.8 Hz and 3.4 Hz, 1, NCHCHCH<sub>2</sub>), 3.51 (d, *J*(H-H) = 3.4 Hz, 2, NCHCHCH<sub>2</sub>), 0.60 (s, 6, SiMe). <sup>1</sup>H NMR (CH<sub>2</sub>Cl<sub>2</sub>, D<sub>2</sub>O insert, selected data): δ 7.50-7.38 and 7.28-7.18 (m, Ph), 6.84-6.51 (m, 3, NCHCHCH), 6.18 (dt, *J*(H-H) = 7.8 Hz and 1.3 Hz, 1, NCHCHCH<sub>2</sub>), 4.64 (dt, *J*(H-H) = 7.8 Hz and 3.4 Hz, 1, NCHCHCH<sub>2</sub>), 3.35 (d, *J*(H-H) = 3.4 Hz, 2, NCHCHCH<sub>2</sub>), 0.46 (s, 6, SiMe). <sup>1</sup>H-<sup>13</sup>C HSQC NMR (CH<sub>2</sub>Cl<sub>2</sub>, D<sub>2</sub>O insert, selected data): δ 130.3 (NCHCHCH<sub>2</sub>), 99.5 (NCHCHCH<sub>2</sub>), 26.3 (NCHCHCH<sub>2</sub>), -1.13 (SiMe). <sup>1</sup>H-<sup>13</sup>C HSQC (CDCl<sub>3</sub>): -0.9 (SiMe<sub>2</sub>Ph), 27.0 (CH<sub>2</sub>), 99.8, 117.6, 121.2, 125.6, 129.2, 130.4 (quin), 127.9, 129.0, 133.1 (SiMe<sub>2</sub>Ph). <sup>1</sup>H-<sup>29</sup>Si HSQC NMR (CH<sub>2</sub>Cl<sub>2</sub>, D<sub>2</sub>O insert): δ 2.5.

### **Triazine.**

*Method 1.* To a solution of triazine (0.011 g, 0.13 mmol) and HSiMe<sub>2</sub>Ph (20 μL, 0.13 mmol) in PhCl (0.6 mL) was added **1-BAF** (0.007 g, 5% mol). A mixture of triazine, mono- and bis(hydrosilylated) triazines was obtained after 30 min at ambient temperature. Addition of a second equivalent of silane resulted in 98% conversion of triazine with formation of the bis(hydrosilylated) product after 3 h at ambient temperature.

*Method 2.* To a solution of HSiMe<sub>2</sub>Ph (15.4 μL, 0.1 mmol) and triazine (8.1 mg, 0.1 mmol) in CD<sub>2</sub>Cl<sub>2</sub> was added [Cp\* Ru(Phen)(CH<sub>3</sub>CN)]PF<sub>6</sub> (3.0 mg, 0.005 mmol). The reaction was periodically monitored by NMR spectroscopy. 90% conversion was achieved after 1.5 h at 70°C to give monohydrosilylated triazine.

*N,N'*-(*SiMe<sub>2</sub>Ph*)-1,2,3,4-tetrahydrotriazine: <sup>1</sup>H NMR (C<sub>6</sub>D<sub>6</sub>): δ 7.54-7.50 (m, 2, Ph), 7.47 (s, 1, N=CH), 7.35-7.28 (m, 2, Ph), 7.26-7.18 (m, 6, Ph), 4.44 (s, 4, CH<sub>2</sub>), 0.24 (s, 6, SiMe), 0.09 (s, 6, SiMe). <sup>13</sup>C NMR (C<sub>6</sub>D<sub>6</sub>, selected data): δ 147.9 (C=N), 59.5 (CH<sub>2</sub>), -2.0 (SiMe), -3.3 (SiMe). <sup>1</sup>H-<sup>29</sup>Si HSQC (C<sub>6</sub>D<sub>6</sub>): δ 1.5 and -1.0.

*N*-(*SiMe<sub>2</sub>Ph*)-1,4-tetrahydrotriazine: <sup>1</sup>H NMR (CD<sub>2</sub>Cl<sub>2</sub>): δ 0.62 (s, 6, SiMe<sub>2</sub>Ph), 4.93 (s, 2,

$\text{CH}_2$ ), 7.09 (s, 2, CH), 7.46-7.49 (m, 3,  $\text{SiMe}_2\text{Ph}$ ), 7.61-7.62 (m, 2,  $\text{SiMe}_2\text{Ph}$ ),  $^1\text{H}$ - $^{13}\text{C}$  HSQC ( $\text{CD}_2\text{Cl}_2$ ):  $\delta$  -2.83 ( $\text{SiMe}_2\text{Ph}$ ), 62.4 ( $\text{CH}_2$ ), 145.4 (CH), 128.4, 133.5, 134.0 ( $\text{SiMe}_2\text{Ph}$ ).

**2-Cyano-1,10-Phenanthroline.** To a solution of  $\text{HSiMe}_2\text{Ph}$  (3.9  $\mu\text{L}$ , 0.025 mmol) and 2-cyano-1,10-phenanthroline (5.1 mg, 0.025 mmol) in  $\text{CD}_2\text{Cl}_2$  was added  $[\text{Cp}^*\text{(phen)Ru}(\text{CH}_3\text{CN})]\text{PF}_6$  (0.8 mg, 0.0013 mmol). The reaction was periodically monitored by NMR spectroscopy. A very little conversion was achieved at  $70^\circ\text{C}$  and a mixture of products was obtained.

**Acridine.** To a solution of  $\text{HSiMe}_2\text{Ph}$  (7.7  $\mu\text{L}$ , 0.05 mmol) and acridine (8.9 mg, 0.05 mmol) in  $\text{CD}_2\text{Cl}_2$  was added  $[\text{Cp}^*\text{Ru(Phen)(CH}_3\text{CN})]\text{PF}_6$  (1.5 mg, 0.0025 mmol). The reaction was periodically monitored by NMR spectroscopy. Full conversion was achieved after 24 h at  $70^\circ\text{C}$  to give hydrosilylated acridine.

*N*-( $\text{SiMe}_2\text{Ph}$ )-9,10-tetrahydroacridine:  $^1\text{H}$  NMR ( $\text{CD}_2\text{Cl}_2$ ):  $\delta$  0.73 (s, 6,  $\text{SiMe}_2\text{Ph}$ ), 4.07 (s, 2,  $\text{CH}_2$ ), 6.72-6.73 (d, 2, acridine), 6.87-6.89 (t, 2, acridine), 7.10-7.14 (m, 4, acridine), 7.45-7.49 (m, 3,  $\text{SiMe}_2\text{Ph}$ ), 7.67-7.69 (m, 2,  $\text{SiMe}_2\text{Ph}$ ),  $^1\text{H}$ - $^{13}\text{C}$  HSQC ( $\text{CD}_2\text{Cl}_2$ ):  $\delta$  1.73 ( $\text{SiMe}_2\text{Ph}$ ), 31.4 ( $\text{CH}_2$ ), 113.2, 120.5, 126.9, 128.5 (acridine), 128.1, 129.7, 133.1 ( $\text{SiMe}_2\text{Ph}$ ).

**Pyrazine.** To a solution of  $\text{HSiMe}_2\text{Ph}$  (7.7  $\mu\text{L}$ , 0.05 mmol) and pyrazine (4.0 mg, 0.05 mmol) in  $\text{CD}_2\text{Cl}_2$  was added  $[\text{Cp}^*\text{(phen)Ru}(\text{CH}_3\text{CN})]\text{PF}_6$  (1.5 mg, 0.0025 mmol). The reaction was periodically monitored by NMR spectroscopy. No reaction was observed at  $70^\circ\text{C}$ .

**Isoquinoline.** To a mixture of  $\text{HSiMe}_2\text{Ph}$  (200.2  $\mu\text{L}$ , 1.30 mmol) and isoquinoline (130.0  $\mu\text{L}$ , 1.00 mmol) was added  $[\text{Cp}^*\text{Ru(Phen)(CH}_3\text{CN})]\text{PF}_6$  (30.0 mg, 0.05 mmol). The reaction was periodically monitored by NMR spectroscopy. 90% conversion was achieved after 9 days at  $70^\circ\text{C}$ .

*N*-( $\text{SiMe}_2\text{Ph}$ )-1,2-isoquinoline:  $^1\text{H}$  NMR ( $\text{CDCl}_3$ ):  $\delta$  7.56-7.59 (m, 2,  $\text{SiMe}_2\text{Ph}$ ), 7.37-7.43 (m, 3,  $\text{SiMe}_2\text{Ph}$ ), 7.09-7.12 (m, 1, quin), 6.98-7.04 (td, 1, quin), 6.84-6.90 (t, 2, quin), 6.38-6.41 (d, 1, quin), 5.53-5.56 (d, 1, quin), 4.28 (s, 2,  $\text{CH}_2$ ), 0.50 (s, 6,  $\text{SiMe}_2\text{Ph}$ ),  $^1\text{H}$ - $^{13}\text{C}$  HSQC ( $\text{CDCl}_3$ ): -2.5 ( $\text{SiMe}_2\text{Ph}$ ), 47.3 ( $\text{CH}_2$ ), 102.3, 125.3, 125.4, 127.6, 136.3 (quin), 127.9, 129.3, 133.5 ( $\text{SiMe}_2\text{Ph}$ ). Isolated yield 0.25 g (95 %).

**7-Chloroquinaldine.** To a solution of HSiMe<sub>2</sub>Ph (3.9 μL, 0.025 mmol) and 7-chloroquinaldine (4.5 mg, 0.025 mmol) in CD<sub>2</sub>Cl<sub>2</sub> was added [Cp<sup>\*</sup>(phen)Ru(CH<sub>3</sub>CN)]PF<sub>6</sub> (0.8 mg, 0.0013 mmol). The reaction was periodically monitored by NMR spectroscopy. No reaction was observed at 70°C.

**2-Phenylquinoline.** To a solution of HSiMe<sub>2</sub>Ph (7.7 μL, 0.05 mmol) and 2-phenylquinoline (10.3 mg, 0.05 mmol) in CD<sub>2</sub>Cl<sub>2</sub> was added [Cp<sup>\*</sup>(phen)Ru(CH<sub>3</sub>CN)]PF<sub>6</sub> (1.5 mg, 0.0025 mmol). The reaction was periodically monitored by NMR spectroscopy. No reaction was observed at 70°C.

**7-Methyl-8-nitroquinoline.** To a solution of HSiMe<sub>2</sub>Ph (7.7 μL, 0.05 mmol) and 7-Methyl-8-nitroquinoline (9.4 mg, 0.05 mmol) in CD<sub>2</sub>Cl<sub>2</sub> was added [Cp<sup>\*</sup>(phen)Ru(CH<sub>3</sub>CN)]PF<sub>6</sub> (1.5 mg, 0.0025 mmol). The reaction was periodically monitored by NMR spectroscopy. No reaction was observed at 70°C.

**2-Ethylpyridine.** To a solution of HSiMe<sub>2</sub>Ph (7.7 μL, 0.05 mmol) and 2-ethylpyridine (5.4 μL, 0.05 mmol) in CD<sub>2</sub>Cl<sub>2</sub> was added [Cp<sup>\*</sup>(phen)Ru(CH<sub>3</sub>CN)]PF<sub>6</sub> (1.5 mg, 0.0025 mmol). The reaction was periodically monitored by NMR spectroscopy. No reaction was observed at 70°C.

**2-Methylquinoxaline.** To a solution of HSiMe<sub>2</sub>Ph (7.7 μL, 0.05 mmol) and 2-methylquinoxaline (7.2 μL, 0.05 mmol) in CD<sub>2</sub>Cl<sub>2</sub> was added [Cp<sup>\*</sup>(phen)Ru(CH<sub>3</sub>CN)]PF<sub>6</sub> (1.5 mg, 0.0025 mmol). The reaction was periodically monitored by NMR spectroscopy. No reaction was observed at 70°C.

### **Hydrosilylation of pyridine in the presence of acetone**

**Method 1.** To a solution of pyridine (0.7 mL, 8.6 mmol) and HSiMe<sub>2</sub>Ph (1.5 mL, 9.8 mmol) in acetone (3 mL) was added **1-PF<sub>6</sub>** (0.025 g, 0.5% mol). There was 93% conversion of pyridine after 5 min at ambient temperature with the formation of *N*-(CMe<sub>2</sub>OSiMe<sub>2</sub>Ph)-1,4-dihydropyridine (less than 5% mol of Me<sub>2</sub>CHOSiMe<sub>2</sub>Ph was also observed in the reaction mixture). Extraction of the product from the reaction mixture with hexane or benzene resulted

in dehydroamination of the product with the formation of 1,4-(C<sub>5</sub>H<sub>6</sub>NH) and CH<sub>2</sub>=C(OSiMe<sub>2</sub>Ph)CH<sub>3</sub>.

*Method 2.* To the solution of pyridine (10.0 μL, 0.12 mmol), HSiMe<sub>2</sub>Ph (20 μL, 0.13 mmol) and acetone (8.8 μL, 0.12 mmol) in CD<sub>2</sub>Cl<sub>2</sub> (0.6 mL) was added **1-PF<sub>6</sub>** (0.003 g, 5% mol). After 4 h at ambient temperature 84% of the pyridine was converted into a mixture of silylated 1,4-dihydropyridine and the product of coupling with acetone (1.6:1). After 2 days at ambient temperature the ratio of products changed to 2.3:1 with the formation of free pyridine and ClSiMe<sub>2</sub>Ph.

*N-(CMe<sub>2</sub>OSiMe<sub>2</sub>Ph)-1,4-dihydropyridine:* <sup>1</sup>H NMR (C<sub>6</sub>D<sub>6</sub>): δ 7.65-7.57 (m, 2, Ph), 7.27-7.17 (m, 3, Ph), 6.08 (d, *J*(H-H) = 8.0 Hz, 2, NCH=CHCH<sub>2</sub>), 4.45 (dt, *J*(H-H) = 8.0 Hz and 3.3 Hz, 2, NCH=CHCH<sub>2</sub>), 3.00 (m, 2, NCH=CHCH<sub>2</sub>), 1.23 (s, 6, OC(CH<sub>3</sub>)<sub>2</sub>), 0.42 (s, 6, SiMe). <sup>1</sup>H NMR (acetone-d<sub>6</sub>): δ 7.70-7.60 (m, 2, Ph), 7.40-7.30 (m, 3, Ph), 6.16 (dt, *J*(H-H) = 8.8 Hz and 1.3 Hz, 2, NCH=CHCH<sub>2</sub>), 4.36 (dt, *J*(H-H) = 8.8 Hz and 3.3 Hz, 2, NCH=CHCH<sub>2</sub>), 2.87 (m, 2, NCH=CHCH<sub>2</sub>), 0.43 (s, 6, SiMe). <sup>1</sup>H-<sup>13</sup>C HSQC (C<sub>6</sub>D<sub>6</sub>, selected data): δ 126.9 (NCH=CHCH<sub>2</sub>), 98.6 (NCH=CHCH<sub>2</sub>), 29.5 (OC(CH<sub>3</sub>)<sub>2</sub>), 0.7 (SiMe). <sup>1</sup>H-<sup>29</sup>Si HSQC (acetone-d<sub>6</sub>): δ -1.3.

**Hydrosilylation of pyridine in the presence of benzaldehyde.** To a solution of pyridine (20 μL, 0.25 mmol), HSiMe<sub>2</sub>Ph (45 μL, 0.29 mmol) and PhCHO (25 μL, 0.25 mmol) in CD<sub>2</sub>Cl<sub>2</sub> (0.6 mL) was added [CpRu(PPr<sup>i</sup><sub>3</sub>)(CH<sub>3</sub>CN)<sub>2</sub>]PF<sub>6</sub> (0.004 g, 3% mol). There was 95 % conversion of benzaldehyde with the formation of *N*-(CHPhOSiMe<sub>2</sub>Ph)-1,4-dihydropyridine.

*N-(CHPhOSiMe<sub>2</sub>Ph)-1,4-dihydropyridine:* <sup>1</sup>H NMR (CD<sub>2</sub>Cl<sub>2</sub>): δ 7.72 (m, 2, Ph), 7.53-7.32 (m, 8, Ph), 5.78 (d, *J*(H-H) = 8.1 Hz, 2, NCHCH), 5.60 (s, 1, OCH), 4.44 (dt, *J*(H-H) = 8.1 Hz and 3.2 Hz, 2, NCHCH), 2.97 (m, 2, CH<sub>2</sub>), 0.59 (s, 3, SiMe), 0.54 (s, 3, SiMe). <sup>13</sup>C NMR (CD<sub>2</sub>Cl<sub>2</sub>): δ 140.9 (Ph), 137.2 (Ph), 133.7 (Ph), 129.8 (NCHCH), 128.8 (Ph), 128.1 (Ph),

127.9 (Ph), 127.8 (Ph), 126.4 (Ph), 99.0 (NCHCH), 86.0 (OCH), 23.0 (CH<sub>2</sub>), -1.3 (SiMe), -1.6 (SiMe). <sup>1</sup>H-<sup>29</sup>Si HSQC (CD<sub>2</sub>Cl<sub>2</sub>): δ 7.2.

**Hydrosilylation of pyridine in the presence of cinnamaldehyde.** To a solution of pyridine (20 μL, 0.25 mmol), HSiMe<sub>2</sub>Ph (45 μL, 0.29 mmol) and PhCH=CHCHO (31 μL, 0.25 mmol) in CD<sub>2</sub>Cl<sub>2</sub> (0.6 mL) was added [CpRu(PPr<sup>i</sup><sub>3</sub>)(CH<sub>3</sub>CN)<sub>2</sub>]PF<sub>6</sub> (0.004 g, 3% mol). Full conversion of cinnamaldehyde was observed after 30 min at ambient temperature with the formation of *N*-(CH(CH=CHPh)OSiMe<sub>2</sub>Ph)-1,4-dihydropyridine.

*N*-(CH(CH=CHPh)OSiMe<sub>2</sub>Ph)-1,4-dihydropyridine: <sup>1</sup>H NMR (CD<sub>2</sub>Cl<sub>2</sub>): δ 7.73 (m, 2, Ph), 7.52-7.28 (m, 8, Ph), 6.77 (dd, *J*(H-H) = 15.9 and 1.5 Hz, 1, =CHPh), 6.25 (dd, *J*(H-H) = 15.9 and 4.3 Hz, 1, =CHCH), 5.92 (d, *J*(H-H) = 8.3 Hz, 2, NCH=CHCH<sub>2</sub>), 5.14 (dd, *J*(H-H) = 1.5 and 4.3 Hz, 1, =CHCH), 4.50 (dt, *J*(H-H) = 8.3 and 3.1 Hz, 2, NCH=CHCH<sub>2</sub>), 3.00 (m, 2, NCH=CHCH<sub>2</sub>), 0.59 (s, 3, SiMe), 0.55 (s, 3, SiMe). <sup>1</sup>H-<sup>13</sup>C HSQC (CD<sub>2</sub>Cl<sub>2</sub>): δ 128.8 (=CHPh), 128.6 (NCH=CHCH<sub>2</sub>), 128.5 (=CHCH), 98.8 (NCH=CHCH<sub>2</sub>), 84.6 (=CHCH), 22.6 (NCH=CHCH<sub>2</sub>), -1.3 (SiMe), -1.6 (SiMe). <sup>1</sup>H-<sup>29</sup>Si HSQC (CD<sub>2</sub>Cl<sub>2</sub>): δ 7.0.

**The reaction of *N*-(SiMe<sub>2</sub>Ph)-1,4-dihydropyridine with benzaldehyde.** To a solution of *N*-(SiMe<sub>2</sub>Ph)-1,4-dihydropyridine (20 μL, 0.09 mmol) and PhCHO (9.5 μL, 0.09 mmol) in CH<sub>2</sub>Cl<sub>2</sub> (0.6 mL) was added [CpRu(PPr<sup>i</sup><sub>3</sub>)(CH<sub>3</sub>CN)<sub>2</sub>]BAF (0.005 g, 5% mol). After 24 h at ambient temperature 100% of the silylated 1,4-dihydropyridine was converted into a mixture of products, containing free pyridine and *N*-(CHPhOSiMe<sub>2</sub>Ph)-1,4-dihydropyridine (1:2.1).

**The reaction of *N*-(SiMe<sub>2</sub>Ph)-1,4-dihydropyridine with 4-Br-(C<sub>6</sub>H<sub>4</sub>)C(O)Cl.** To a solution of *N*-(SiMe<sub>2</sub>Ph)-1,4-dihydropyridine (30 μL, 0.14 mmol) in C<sub>6</sub>D<sub>6</sub> (0.6 mL) was added 4-Br-(C<sub>6</sub>H<sub>4</sub>)C(O)Cl (0.030 g, 0.14 mmol). The resulting yellow solution was heated at 80°C for 1 h, which resulted in the formation of the corresponding amide and ClSiMe<sub>2</sub>Ph.

4-Br-(C<sub>6</sub>H<sub>4</sub>)C(O)(NC<sub>5</sub>H<sub>6</sub>): <sup>1</sup>H NMR (C<sub>6</sub>D<sub>6</sub>, 70°C): δ 7.12 (d, *J*(H-H) = 4.2 Hz, 2, C<sub>6</sub>H<sub>4</sub>), 6.95



(d,  $J(\text{H-H}) = 4.2$  Hz, 2,  $\text{C}_6\text{H}_4$ ), 6.73 (bs, 2,  $\text{NC}_5\text{H}_6$ ), 4.59 (bs, 2,  $\text{NC}_5\text{H}_6$ ), 2.55 (bs, 2,  $\text{NC}_5\text{H}_6$ ).

$^1\text{H}$ - $^{13}\text{C}$  HSQC ( $\text{C}_6\text{D}_6$ ,  $70^\circ\text{C}$ ):  $\delta$  131.5 ( $\text{C}_6\text{H}_4$ ), 129.4 ( $\text{C}_6\text{H}_4$ ), 106.6 ( $m\text{-NC}_5\text{H}_6$ ), 23.1 ( $p\text{-NC}_5\text{H}_6$ ).

### Catalytic hydrogenation by $\text{HSiMe}_2\text{Ph}/\text{EtOH}$

**Acridine.** To a solution of  $\text{HSiMe}_2\text{Ph}$  (9.24  $\mu\text{L}$ , 0.6 mmol), acridine (8.9 mg, 0.05 mmol) and EtOH (6.9  $\mu\text{L}$ , 0.15 mmol) in Acetone- $\text{d}_6$  was added  $[\text{Cp}^*(\text{phen})\text{Ru}(\text{CH}_3\text{CN})]\text{PF}_6$  (1.5 mg, 0.0025 mmol). The reaction was periodically monitored by NMR spectroscopy. Full conversion was achieved after 10 m at room temperature. 1,8-dihydroacridine and  $\text{CH}_3\text{CH}_2\text{OSiMe}_2\text{Ph}$  were obtained.

*1,8-dihydroacridine:*  $^1\text{H}$  NMR ( $\text{CD}_2\text{Cl}_2$ ):  $\delta$  7.86 (s, br, 1, NH), 7.08-7.09 (d, 2, acridine), 7.03-7.05 (t, 2, acridine), 6.77-6.80 (m, 4, acridine), 4.02 (s, 2,  $\text{CH}_2$ ),  $^1\text{H}$ - $^{13}\text{C}$  HSQC ( $\text{CD}_2\text{Cl}_2$ ):  $\delta$  31.4 ( $\text{CH}_2$ ), 113.6, 120.1, 126.9, 128.5 (acridine).

**Pyrazine.** To a solution of  $\text{HSiMe}_2\text{Ph}$  (15.4  $\mu\text{L}$ , 0.1 mmol), pyrazine (8.0 mg, 0.1 mmol) and EtOH (13.8  $\mu\text{L}$ , 0.3 mmol) in Acetone- $\text{d}_6$  was added  $[\text{Cp}^*(\text{phen})\text{Ru}(\text{CH}_3\text{CN})]\text{PF}_6$  (3.0 mg, 0.005 mmol). The reaction was periodically monitored by NMR spectroscopy at room temperature.  $\text{Cp}^*(\text{phen})\text{Ru}(\text{pyrazine})$  complex was obtained.

**2,6-Lutidine.** To a solution of  $\text{HSiMe}_2\text{Ph}$  (7.7  $\mu\text{L}$ , 0.05 mmol), 2,6-lutidine (5.4  $\mu\text{L}$ , 0.05 mmol) and EtOH (6.9  $\mu\text{L}$ , 0.15 mmol) in Acetone- $\text{d}_6$  was added  $[\text{Cp}^*(\text{phen})\text{Ru}(\text{CH}_3\text{CN})]\text{PF}_6$  (1.5 mg, 0.0025 mmol). The reaction was periodically monitored by NMR spectroscopy at room temperature. Formation of  $\text{EtOSiMe}_2\text{Ph}$  and  $\text{H}_2$  was observed.

**2,4-Lutidine.** To a solution of  $\text{HSiMe}_2\text{Ph}$  (7.7  $\mu\text{L}$ , 0.05 mmol), 2,4-lutidine (5.4  $\mu\text{L}$ , 0.05 mmol) and EtOH (6.9  $\mu\text{L}$ , 0.15 mmol) in Acetone- $\text{d}_6$  was added  $[\text{Cp}^*(\text{phen})\text{Ru}(\text{CH}_3\text{CN})]\text{PF}_6$  (1.5 mg, 0.0025 mmol). The reaction was periodically monitored by NMR spectroscopy at room temperature. Formation of  $\text{EtOSiMe}_2\text{Ph}$  and  $\text{H}_2$  was observed.

**2-Phenylquinoline.** To a solution of  $\text{HSiMe}_2\text{Ph}$  (7.7  $\mu\text{L}$ , 0.05 mmol) and 2-phenylquinoline (10.3 mg, 0.05 mmol) and EtOH (6.9  $\mu\text{L}$ , 0.15 mmol) in Acetone- $\text{d}_6$  was added

$[\text{Cp}^*(\text{phen})\text{Ru}(\text{CH}_3\text{CN})]\text{PF}_6$  (1.5 mg, 0.0025 mmol). The reaction was periodically monitored by NMR spectroscopy at room temperature. Formation of  $\text{EtOSiMe}_2\text{Ph}$  and  $\text{H}_2$  was observed.

**2-Ethylpyridine.** To a solution of  $\text{HSiMe}_2\text{Ph}$  (7.7  $\mu\text{L}$ , 0.05 mmol) and 2-ethylpyridine (5.4  $\mu\text{L}$ , 0.05 mmol) and  $\text{EtOH}$  (6.9  $\mu\text{L}$ , 0.15 mmol) in  $\text{Acetone-d}_6$  was added  $[\text{Cp}^*(\text{phen})\text{Ru}(\text{CH}_3\text{CN})]\text{PF}_6$  (1.5 mg, 0.0025 mmol). The reaction was periodically monitored by NMR spectroscopy at room temperature. Formation of  $\text{EtOSiMe}_2\text{Ph}$  and  $\text{H}_2$  was observed.

### Kinetic studies

$\text{HSiMe}_2\text{Ph}$  (23.7  $\mu\text{L}$ , 0.15 mmol) was added to a frozen solution of  $[\text{Cp}(\text{iPrP}_3)\text{Ru}(\text{CH}_3\text{CN})]\text{BAF}$  (0.96 mg, 0.0009 mmol) and pyridine (96.8 – 145.2  $\mu\text{L}$ , 1.20 – 1.80 mmol, (8 – 12 eq.)) in  $\text{CD}_2\text{Cl}_2$ . The reaction was automatically monitored by NMR spectroscopy at room temperature every minute.

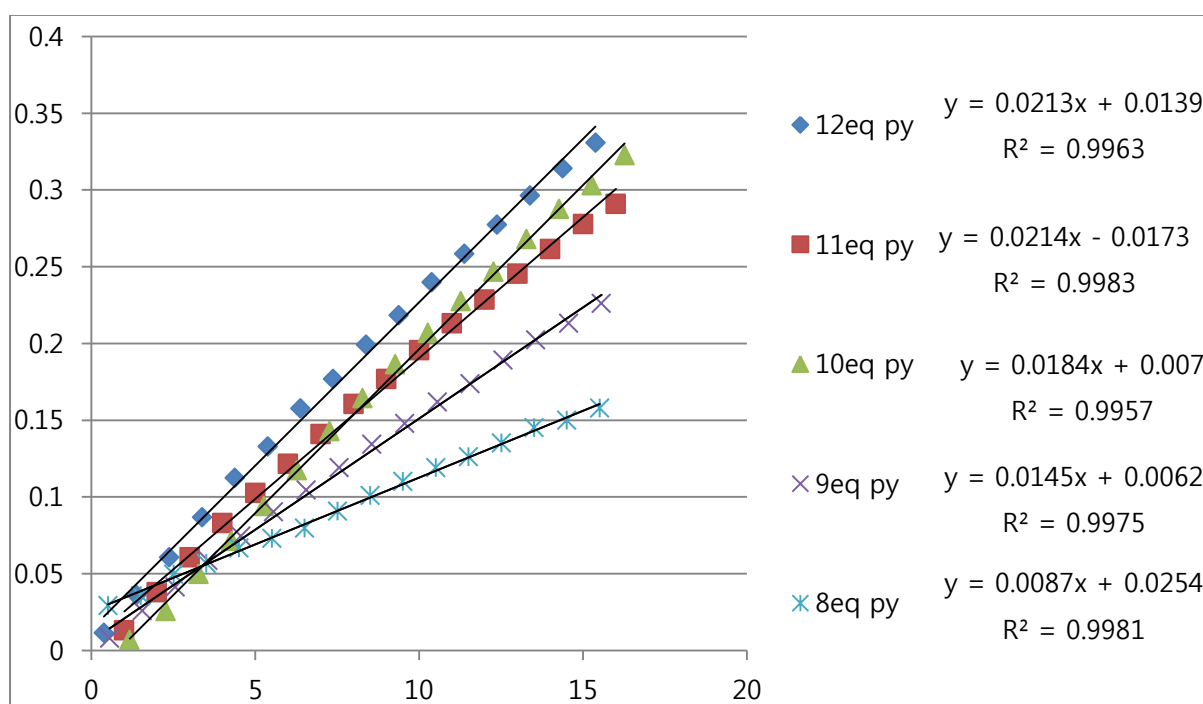

### The deduction of the rate law.

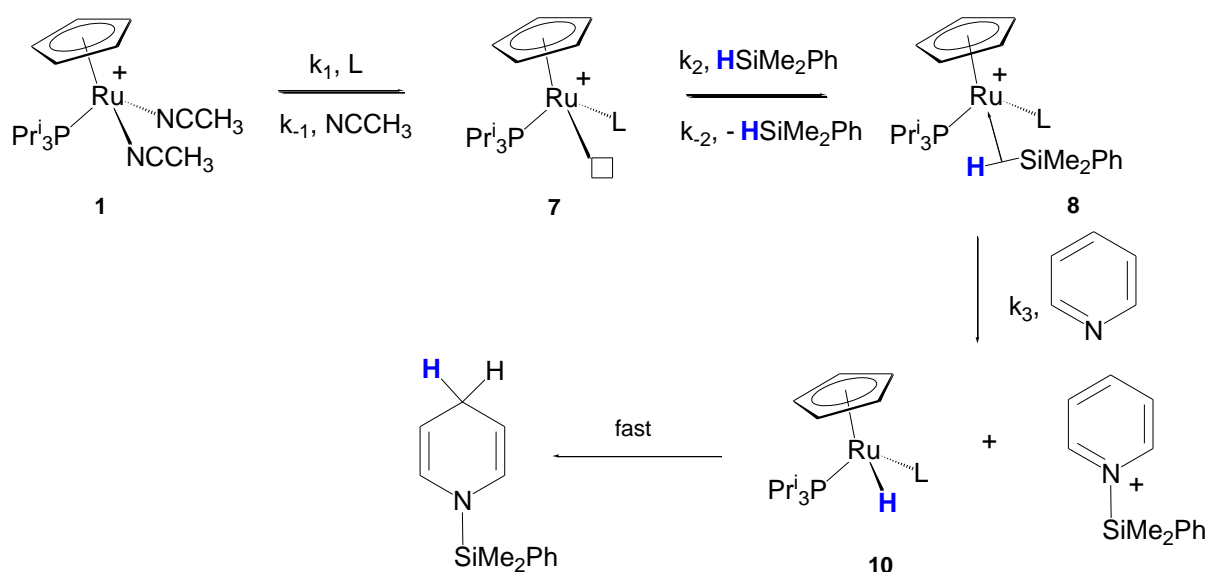

Assuming a fast equilibrium between **1** and **7** and the steady state condition for **8**,

$$-\frac{d[8]}{dt} = k_2[7] - k_{-2}[8] - k_3[8][\text{pyr}] = 0$$

Hence

$$k_2[7] = (k_{-2} + k_3[\text{pyr}])[8]$$

$$k_1[1] = k_{-1}[7]$$

$$\text{rate} = k_3[8][\text{pyr}] = k_3 \frac{k_2[7][\text{HSiMe}_2\text{Ph}][\text{pyr}]}{k_{-1}k_{-2} + k_{-1}k_3[\text{pyr}]} = \frac{k_1k_2k_3[1][\text{HSiMe}_2\text{Ph}][\text{pyr}]}{k_{-1}k_{-2} + k_{-1}k_3[\text{pyr}]}$$

- 1 (a) C. M. Standfest-Hauser, K. Mereiter, R. Schmid, K. Kirchner, *Eur. J. Inorg. Chem.*, **2003**, 1883. (b) A. L. Osipov, D. V. Gutsulyak, L. G. Kuzmina, J. A. K. Howard, D. A. Lemenovskii, G. Suss-Fink, G. I. Nikonov, *J. Organomet. Chem.*, **2007**, 692, 5081.
